# Supplementary material for: Comparison Between Flat and Round Peaches, Genomic Evidences of Heterozygosity Events
Source: Front Plant Sci. 2019 May 14;10:592. doi: 10.3389/fpls.2019.00592 (PMC6535965; doi:10.3389/fpls.2019.00592)
Supplement: DATA SHEET S3 — The sanger sequencing of PCR product amplified from CAD_F/CAD_R primer pair in 258 peach accessions. [file Data_Sheet_3.ZIP]

Archive with 523 entries (522 files):
- 2018_9_CAD/
- 2018_9_CAD/W1_WF_TSS20180914-0532-1036_A06.ab1
- 2018_9_CAD/W1_WF_TSS20180914-0532-1036_A06.seq
- 2018_9_CAD/W2_WF_TSS20180914-0532-1036_B06.ab1
- 2018_9_CAD/W2_WF_TSS20180914-0532-1036_B06.seq
- 2018_9_CAD/W3_WF_TSS20180914-0532-1036_C06.ab1
- 2018_9_CAD/W3_WF_TSS20180914-0532-1036_C06.seq
- 2018_9_CAD/W4_WF_TSS20180914-0532-1036_D06.ab1
- 2018_9_CAD/W4_WF_TSS20180914-0532-1036_D06.seq
- 2018_9_CAD/W5_WF_TSS20180914-0532-1036_E06.ab1
- 2018_9_CAD/W5_WF_TSS20180914-0532-1036_E06.seq
- 2018_9_CAD/W6_WF_TSS20180914-0532-1036_F06.ab1
- 2018_9_CAD/W6_WF_TSS20180914-0532-1036_F06.seq
- 2018_9_CAD/W8_WF_TSS20180914-0532-1036_G06.ab1
- 2018_9_CAD/W8_WF_TSS20180914-0532-1036_G06.seq
- 2018_9_CAD/W9_WF_TSS20180914-0532-1036_A07.ab1
- 2018_9_CAD/W9_WF_TSS20180914-0532-1036_A07.seq
- 2018_9_CAD/W10_WF_TSS20180914-0532-1036_B07.ab1
- 2018_9_CAD/W10_WF_TSS20180914-0532-1036_B07.seq
- 2018_9_CAD/W11_WF_TSS20180914-0532-1036_C07.ab1
- 2018_9_CAD/W11_WF_TSS20180914-0532-1036_C07.seq
- 2018_9_CAD/1_CAD-F_TSS20180909-0532-0622_F01.ab1
- 2018_9_CAD/1_CAD-F_TSS20180909-0532-0622_F01.seq
- 2018_9_CAD/3_CAD-F_TSS20180909-0532-0622_A03.ab1
- 2018_9_CAD/3_CAD-F_TSS20180909-0532-0622_A03.seq
- 2018_9_CAD/4_CAD-F_TSS20180909-0532-0622_B03.ab1
- 2018_9_CAD/4_CAD-F_TSS20180909-0532-0622_B03.seq
- 2018_9_CAD/6_CAD-F_TSS20180909-0532-0622_C03.ab1
- 2018_9_CAD/6_CAD-F_TSS20180909-0532-0622_C03.seq
- 2018_9_CAD/9_CAD-F_TSS20180909-0532-0622_A01.ab1
- 2018_9_CAD/9_CAD-F_TSS20180909-0532-0622_A01.seq
- 2018_9_CAD/10_CAD-F_TSS20180909-0532-0622_B01.ab1
- 2018_9_CAD/10_CAD-F_TSS20180909-0532-0622_B01.seq
- 2018_9_CAD/11_CAD-F_TSS20180909-0532-0622_C01.ab1
- 2018_9_CAD/11_CAD-F_TSS20180909-0532-0622_C01.seq
- 2018_9_CAD/12_CAD-F_TSS20180909-0532-0622_D01.ab1
- 2018_9_CAD/12_CAD-F_TSS20180909-0532-0622_D01.seq
- 2018_9_CAD/13_CAD-F_TSS20180909-0532-0622_E01.ab1
- 2018_9_CAD/13_CAD-F_TSS20180909-0532-0622_E01.seq
- 2018_9_CAD/16_CAD-F_TSS20180909-0532-0622_H02.ab1
- 2018_9_CAD/16_CAD-F_TSS20180909-0532-0622_H02.seq
- 2018_9_CAD/18_CAD-F_TSS20180909-0532-0622_C04.ab1
- 2018_9_CAD/18_CAD-F_TSS20180909-0532-0622_C04.seq
- 2018_9_CAD/19_CAD-F_TSS20180909-0532-0622_D04.ab1
- 2018_9_CAD/19_CAD-F_TSS20180909-0532-0622_D04.seq
- 2018_9_CAD/21_CAD-F_TSS20180909-0532-0622_E04.ab1
- 2018_9_CAD/21_CAD-F_TSS20180909-0532-0622_E04.seq
- 2018_9_CAD/22_CAD-F_TSS20180909-0532-0622_F04.ab1
- 2018_9_CAD/22_CAD-F_TSS20180909-0532-0622_F04.seq
- 2018_9_CAD/23_CAD-F_TSS20180909-0532-0622_G04.ab1
- 2018_9_CAD/23_CAD-F_TSS20180909-0532-0622_G04.seq
- 2018_9_CAD/24_CAD-F_TSS20180909-0532-0622_H04.ab1
- 2018_9_CAD/24_CAD-F_TSS20180909-0532-0622_H04.seq
- 2018_9_CAD/25_CAD-F_TSS20180909-0532-0622_A05.ab1
- 2018_9_CAD/25_CAD-F_TSS20180909-0532-0622_A05.seq
- 2018_9_CAD/26_CAD-F_TSS20180909-0532-0622_B05.ab1
- 2018_9_CAD/26_CAD-F_TSS20180909-0532-0622_B05.seq
- 2018_9_CAD/27_CAD-F_TSS20180909-0532-0622_C05.ab1
- 2018_9_CAD/27_CAD-F_TSS20180909-0532-0622_C05.seq
- 2018_9_CAD/28_CAD-F_TSS20180909-0532-0622_D05.ab1
- 2018_9_CAD/28_CAD-F_TSS20180909-0532-0622_D05.seq
- 2018_9_CAD/29_CAD-F_TSS20180909-0532-0622_E05.ab1
- 2018_9_CAD/29_CAD-F_TSS20180909-0532-0622_E05.seq
- 2018_9_CAD/30_CAD-F_TSS20180909-0532-0622_F05.ab1
- 2018_9_CAD/30_CAD-F_TSS20180909-0532-0622_F05.seq
- 2018_9_CAD/31_CAD-F_TSS20180909-0532-0622_G05.ab1
- 2018_9_CAD/31_CAD-F_TSS20180909-0532-0622_G05.seq
- 2018_9_CAD/32_CAD-F_TSS20180909-0532-0622_H05.ab1
- 2018_9_CAD/32_CAD-F_TSS20180909-0532-0622_H05.seq
- 2018_9_CAD/33_CAD-F_TSS20180909-0532-0622_A06.ab1
- 2018_9_CAD/33_CAD-F_TSS20180909-0532-0622_A06.seq
- 2018_9_CAD/34_CAD-F_TSS20180909-0532-0622_B06.ab1
- 2018_9_CAD/34_CAD-F_TSS20180909-0532-0622_B06.seq
- 2018_9_CAD/35_CAD-F_TSS20180909-0532-0622_C06.ab1
- 2018_9_CAD/35_CAD-F_TSS20180909-0532-0622_C06.seq
- 2018_9_CAD/36_CAD-F_TSS20180909-0532-0622_D06.ab1
- 2018_9_CAD/36_CAD-F_TSS20180909-0532-0622_D06.seq
- 2018_9_CAD/37_CAD-F_TSS20180909-0532-0622_E06.ab1
- 2018_9_CAD/37_CAD-F_TSS20180909-0532-0622_E06.seq
- 2018_9_CAD/38_CAD-F_TSS20180909-0532-0622_F06.ab1
- 2018_9_CAD/38_CAD-F_TSS20180909-0532-0622_F06.seq
- 2018_9_CAD/39_CAD-F_TSS20180909-0532-0622_G06.ab1
- 2018_9_CAD/39_CAD-F_TSS20180909-0532-0622_G06.seq
- 2018_9_CAD/40_CAD-F_TSS20180909-0532-0622_H06.ab1
- 2018_9_CAD/40_CAD-F_TSS20180909-0532-0622_H06.seq
- 2018_9_CAD/41_CAD-F_TSS20180909-0532-0622_A07.ab1
- 2018_9_CAD/41_CAD-F_TSS20180909-0532-0622_A07.seq
- 2018_9_CAD/42_CAD-F_TSS20180909-0532-0622_B07.ab1
- 2018_9_CAD/42_CAD-F_TSS20180909-0532-0622_B07.seq
- 2018_9_CAD/43_CAD-F_TSS20180909-0532-0622_C07.ab1
- 2018_9_CAD/43_CAD-F_TSS20180909-0532-0622_C07.seq
- 2018_9_CAD/44_CAD-F_TSS20180909-0532-0622_D07.ab1
- 2018_9_CAD/44_CAD-F_TSS20180909-0532-0622_D07.seq
- 2018_9_CAD/45_CAD-F_TSS20180909-0532-0622_E07.ab1
- 2018_9_CAD/45_CAD-F_TSS20180909-0532-0622_E07.seq
- 2018_9_CAD/46_CAD-F_TSS20180909-0532-0622_F07.ab1
- 2018_9_CAD/46_CAD-F_TSS20180909-0532-0622_F07.seq
- 2018_9_CAD/47_CAD-F_TSS20180909-0532-0622_G07.ab1
- 2018_9_CAD/47_CAD-F_TSS20180909-0532-0622_G07.seq
- 2018_9_CAD/48_CAD-F_TSS20180909-0532-0622_H07.ab1
- 2018_9_CAD/48_CAD-F_TSS20180909-0532-0622_H07.seq
- 2018_9_CAD/49_CAD-F_TSS20180909-0532-0622_A08.ab1
- 2018_9_CAD/49_CAD-F_TSS20180909-0532-0622_A08.seq
- 2018_9_CAD/50_CAD-F_TSS20180909-0532-0622_B08.ab1
- 2018_9_CAD/50_CAD-F_TSS20180909-0532-0622_B08.seq
- 2018_9_CAD/51_CAD-F_TSS20180909-0532-0622_C08.ab1
- 2018_9_CAD/51_CAD-F_TSS20180909-0532-0622_C08.seq
- 2018_9_CAD/52_CAD-F_TSS20180909-0532-0622_D08.ab1
- 2018_9_CAD/52_CAD-F_TSS20180909-0532-0622_D08.seq
- 2018_9_CAD/53_CAD-F_TSS20180909-0532-0622_E08.ab1
- 2018_9_CAD/53_CAD-F_TSS20180909-0532-0622_E08.seq
- 2018_9_CAD/54_CAD-F_TSS20180909-0532-0622_F08.ab1
- 2018_9_CAD/54_CAD-F_TSS20180909-0532-0622_F08.seq
- 2018_9_CAD/55_CAD-F_TSS20180909-0532-0622_G08.ab1
- 2018_9_CAD/55_CAD-F_TSS20180909-0532-0622_G08.seq
- 2018_9_CAD/56_CAD-F_TSS20180909-0532-0622_H08.ab1
- 2018_9_CAD/56_CAD-F_TSS20180909-0532-0622_H08.seq
- 2018_9_CAD/57_CAD-F_TSS20180909-0532-0622_A09.ab1
- 2018_9_CAD/57_CAD-F_TSS20180909-0532-0622_A09.seq
- 2018_9_CAD/58_CAD-F_TSS20180909-0532-0622_B09.ab1
- 2018_9_CAD/58_CAD-F_TSS20180909-0532-0622_B09.seq
- 2018_9_CAD/59_CAD-F_TSS20180909-0532-0622_C09.ab1
- 2018_9_CAD/59_CAD-F_TSS20180909-0532-0622_C09.seq
- 2018_9_CAD/60_CAD-F_TSS20180909-0532-0622_D09.ab1
- 2018_9_CAD/60_CAD-F_TSS20180909-0532-0622_D09.seq
- 2018_9_CAD/61_CAD-F_TSS20180909-0532-0622_E09.ab1
- 2018_9_CAD/61_CAD-F_TSS20180909-0532-0622_E09.seq
- 2018_9_CAD/62_CAD-F_TSS20180909-0532-0622_F09.ab1
- 2018_9_CAD/62_CAD-F_TSS20180909-0532-0622_F09.seq
- 2018_9_CAD/63_CAD-F_TSS20180909-0532-0622_G09.ab1
- 2018_9_CAD/63_CAD-F_TSS20180909-0532-0622_G09.seq
- 2018_9_CAD/64_CAD-F_TSS20180909-0532-0622_H09.ab1
- 2018_9_CAD/64_CAD-F_TSS20180909-0532-0622_H09.seq
- 2018_9_CAD/65_CAD-F_TSS20180909-0532-0622_A10.ab1
- 2018_9_CAD/65_CAD-F_TSS20180909-0532-0622_A10.seq
- 2018_9_CAD/66_CAD-F_TSS20180909-0532-0622_B10.ab1
- 2018_9_CAD/66_CAD-F_TSS20180909-0532-0622_B10.seq
- 2018_9_CAD/67_CAD-F_TSS20180909-0532-0622_C10.ab1
- 2018_9_CAD/67_CAD-F_TSS20180909-0532-0622_C10.seq
- 2018_9_CAD/68_CAD-F_TSS20180909-0532-0622_D10.ab1
- 2018_9_CAD/68_CAD-F_TSS20180909-0532-0622_D10.seq
- 2018_9_CAD/69_CAD-F_TSS20180909-0532-0622_E10.ab1
- 2018_9_CAD/69_CAD-F_TSS20180909-0532-0622_E10.seq
- 2018_9_CAD/70_CAD-F_TSS20180909-0532-0622_F10.ab1
- 2018_9_CAD/70_CAD-F_TSS20180909-0532-0622_F10.seq
- 2018_9_CAD/71_CAD-F_TSS20180909-0532-0622_G10.ab1
- 2018_9_CAD/71_CAD-F_TSS20180909-0532-0622_G10.seq
- 2018_9_CAD/72_CAD-F_TSS20180909-0532-0622_H10.ab1
- 2018_9_CAD/72_CAD-F_TSS20180909-0532-0622_H10.seq
- 2018_9_CAD/73_CAD-F_TSS20180909-0532-0622_A11.ab1
- 2018_9_CAD/73_CAD-F_TSS20180909-0532-0622_A11.seq
- 2018_9_CAD/74_CAD-F_TSS20180909-0532-0622_B11.ab1
- 2018_9_CAD/74_CAD-F_TSS20180909-0532-0622_B11.seq
- 2018_9_CAD/75_CAD-F_TSS20180909-0532-0622_C11.ab1
- 2018_9_CAD/75_CAD-F_TSS20180909-0532-0622_C11.seq
- 2018_9_CAD/76_CAD-F_TSS20180909-0532-0622_D11.ab1
- 2018_9_CAD/76_CAD-F_TSS20180909-0532-0622_D11.seq
- 2018_9_CAD/77_CAD-F_TSS20180909-0532-0622_E11.ab1
- 2018_9_CAD/77_CAD-F_TSS20180909-0532-0622_E11.seq
- 2018_9_CAD/78_CAD-F_TSS20180909-0532-0622_F11.ab1
- 2018_9_CAD/78_CAD-F_TSS20180909-0532-0622_F11.seq
- 2018_9_CAD/79_CAD-F_TSS20180909-0532-0622_G11.ab1
- 2018_9_CAD/79_CAD-F_TSS20180909-0532-0622_G11.seq
- 2018_9_CAD/80_CAD-F_TSS20180909-0532-0622_H11.ab1
- 2018_9_CAD/80_CAD-F_TSS20180909-0532-0622_H11.seq
- 2018_9_CAD/81_CAD-F_TSS20180909-0532-0622_A12.ab1
- 2018_9_CAD/81_CAD-F_TSS20180909-0532-0622_A12.seq
- 2018_9_CAD/82_CAD-F_TSS20180909-0532-0622_B12.ab1
- 2018_9_CAD/82_CAD-F_TSS20180909-0532-0622_B12.seq
- 2018_9_CAD/83_CAD-F_TSS20180909-0532-0622_C12.ab1
- 2018_9_CAD/83_CAD-F_TSS20180909-0532-0622_C12.seq
- 2018_9_CAD/84_CAD-F_TSS20180909-0532-0622_D12.ab1
- 2018_9_CAD/84_CAD-F_TSS20180909-0532-0622_D12.seq
- 2018_9_CAD/85_CAD-F_TSS20180909-0532-0622_E12.ab1
- 2018_9_CAD/85_CAD-F_TSS20180909-0532-0622_E12.seq
- 2018_9_CAD/86_CAD-F_TSS20180909-0532-0622_F12.ab1
- 2018_9_CAD/86_CAD-F_TSS20180909-0532-0622_F12.seq
- 2018_9_CAD/87_CAD-F_TSS20180909-0532-0622_G12.ab1
- 2018_9_CAD/87_CAD-F_TSS20180909-0532-0622_G12.seq
- 2018_9_CAD/88_CAD-F_TSS20180909-0532-0622_H12.ab1
- 2018_9_CAD/88_CAD-F_TSS20180909-0532-0622_H12.seq
- 2018_9_CAD/89_CAD-F_TSS20180909-0532-0622_A02.ab1
- 2018_9_CAD/89_CAD-F_TSS20180909-0532-0622_A02.seq
- 2018_9_CAD/90_CAD-F_TSS20180909-0532-0622_B02.ab1
- 2018_9_CAD/90_CAD-F_TSS20180909-0532-0622_B02.seq
- 2018_9_CAD/91_CAD-F_TSS20180909-0532-0622_C02.ab1
- 2018_9_CAD/91_CAD-F_TSS20180909-0532-0622_C02.seq
- 2018_9_CAD/92_CAD-F_TSS20180909-0532-0622_D02.ab1
- 2018_9_CAD/92_CAD-F_TSS20180909-0532-0622_D02.seq
- 2018_9_CAD/93_CAD-F_TSS20180909-0532-0622_E02.ab1
- 2018_9_CAD/93_CAD-F_TSS20180909-0532-0622_E02.seq
- 2018_9_CAD/94_CAD-F_TSS20180909-0532-0622_F02.ab1
- 2018_9_CAD/94_CAD-F_TSS20180909-0532-0622_F02.seq
- 2018_9_CAD/95_CAD-F_TSS20180909-0532-0622_G02.ab1
- 2018_9_CAD/95_CAD-F_TSS20180909-0532-0622_G02.seq
- 2018_9_CAD/99_CAD-F_TSS20180909-0532-0623_D03.ab1
- 2018_9_CAD/99_CAD-F_TSS20180909-0532-0623_D03.seq
- 2018_9_CAD/100_CAD-F_TSS20180909-0532-0623_E03.ab1
- 2018_9_CAD/100_CAD-F_TSS20180909-0532-0623_E03.seq
- 2018_9_CAD/101_CAD-F_TSS20180909-0532-0623_F03.ab1
- 2018_9_CAD/101_CAD-F_TSS20180909-0532-0623_F03.seq
- 2018_9_CAD/102_CAD-F_TSS20180909-0532-0623_G03.ab1
- 2018_9_CAD/102_CAD-F_TSS20180909-0532-0623_G03.seq
- 2018_9_CAD/103_CAD-F_TSS20180909-0532-0623_H03.ab1
- 2018_9_CAD/103_CAD-F_TSS20180909-0532-0623_H03.seq
- 2018_9_CAD/104_CAD-F_TSS20180909-0532-0623_A03.ab1
- 2018_9_CAD/104_CAD-F_TSS20180909-0532-0623_A03.seq
- 2018_9_CAD/105_CAD-F_TSS20180909-0532-0623_A04.ab1
- 2018_9_CAD/105_CAD-F_TSS20180909-0532-0623_A04.seq
- 2018_9_CAD/106_CAD-F_TSS20180909-0532-0623_B04.ab1
- 2018_9_CAD/106_CAD-F_TSS20180909-0532-0623_B04.seq
- 2018_9_CAD/107_CAD-F_TSS20180909-0532-0623_C04.ab1
- 2018_9_CAD/107_CAD-F_TSS20180909-0532-0623_C04.seq
- 2018_9_CAD/108_CAD-F_TSS20180909-0532-0623_D04.ab1
- 2018_9_CAD/108_CAD-F_TSS20180909-0532-0623_D04.seq
- 2018_9_CAD/109_CAD-F_TSS20180909-0532-0623_E04.ab1
- 2018_9_CAD/109_CAD-F_TSS20180909-0532-0623_E04.seq
- 2018_9_CAD/110_CAD-F_TSS20180909-0532-0623_F04.ab1
- 2018_9_CAD/110_CAD-F_TSS20180909-0532-0623_F04.seq
- 2018_9_CAD/111_CAD-F_TSS20180909-0532-0623_G04.ab1
- 2018_9_CAD/111_CAD-F_TSS20180909-0532-0623_G04.seq
- 2018_9_CAD/112_CAD-F_TSS20180909-0532-0623_H04.ab1
- 2018_9_CAD/112_CAD-F_TSS20180909-0532-0623_H04.seq
- 2018_9_CAD/113_CAD-F_TSS20180909-0532-0623_H02.ab1
- 2018_9_CAD/113_CAD-F_TSS20180909-0532-0623_H02.seq
- 2018_9_CAD/115_CAD-F_TSS20180909-0532-0623_A01.ab1
- 2018_9_CAD/115_CAD-F_TSS20180909-0532-0623_A01.seq
- 2018_9_CAD/116_CAD-F_TSS20180909-0532-0623_B01.ab1
- 2018_9_CAD/116_CAD-F_TSS20180909-0532-0623_B01.seq
- 2018_9_CAD/117_CAD-F_TSS20180909-0532-0623_C01.ab1
- 2018_9_CAD/117_CAD-F_TSS20180909-0532-0623_C01.seq
- 2018_9_CAD/118_CAD-F_TSS20180909-0532-0623_D01.ab1
- 2018_9_CAD/118_CAD-F_TSS20180909-0532-0623_D01.seq
- 2018_9_CAD/119_CAD-F_TSS20180909-0532-0623_E01.ab1
- 2018_9_CAD/119_CAD-F_TSS20180909-0532-0623_E01.seq
- 2018_9_CAD/120_CAD-F_TSS20180909-0532-0623_F01.ab1
- 2018_9_CAD/120_CAD-F_TSS20180909-0532-0623_F01.seq
- 2018_9_CAD/121_CAD-F_TSS20180909-0532-0623_A05.ab1
- 2018_9_CAD/121_CAD-F_TSS20180909-0532-0623_A05.seq
- 2018_9_CAD/122_CAD-F_TSS20180909-0532-0623_B05.ab1
- 2018_9_CAD/122_CAD-F_TSS20180909-0532-0623_B05.seq
- 2018_9_CAD/123_CAD-F_TSS20180909-0532-0623_C05.ab1
- 2018_9_CAD/123_CAD-F_TSS20180909-0532-0623_C05.seq
- 2018_9_CAD/124_CAD-F_TSS20180909-0532-0623_D05.ab1
- 2018_9_CAD/124_CAD-F_TSS20180909-0532-0623_D05.seq
- 2018_9_CAD/125_CAD-F_TSS20180909-0532-0623_E05.ab1
- 2018_9_CAD/125_CAD-F_TSS20180909-0532-0623_E05.seq
- 2018_9_CAD/126_CAD-F_TSS20180909-0532-0623_F05.ab1
- 2018_9_CAD/126_CAD-F_TSS20180909-0532-0623_F05.seq
- 2018_9_CAD/127_CAD-F_TSS20180909-0532-0623_G05.ab1
- 2018_9_CAD/127_CAD-F_TSS20180909-0532-0623_G05.seq
- 2018_9_CAD/128_CAD-F_TSS20180909-0532-0623_H05.ab1
- 2018_9_CAD/128_CAD-F_TSS20180909-0532-0623_H05.seq
- 2018_9_CAD/129_CAD-F_TSS20180909-0532-0623_A06.ab1
- 2018_9_CAD/129_CAD-F_TSS20180909-0532-0623_A06.seq
- 2018_9_CAD/130_CAD-F_TSS20180909-0532-0623_B06.ab1
- 2018_9_CAD/130_CAD-F_TSS20180909-0532-0623_B06.seq
- 2018_9_CAD/131_CAD-F_TSS20180909-0532-0623_C06.ab1
- 2018_9_CAD/131_CAD-F_TSS20180909-0532-0623_C06.seq
- 2018_9_CAD/132_CAD-F_TSS20180909-0532-0623_D06.ab1
- 2018_9_CAD/132_CAD-F_TSS20180909-0532-0623_D06.seq
- 2018_9_CAD/133_CAD-F_TSS20180909-0532-0623_E06.ab1
- 2018_9_CAD/133_CAD-F_TSS20180909-0532-0623_E06.seq
- 2018_9_CAD/134_CAD-F_TSS20180909-0532-0623_F06.ab1
- 2018_9_CAD/134_CAD-F_TSS20180909-0532-0623_F06.seq
- 2018_9_CAD/135_CAD-F_TSS20180909-0532-0623_G06.ab1
- 2018_9_CAD/135_CAD-F_TSS20180909-0532-0623_G06.seq
- 2018_9_CAD/136_CAD-F_TSS20180909-0532-0623_H06.ab1
- 2018_9_CAD/136_CAD-F_TSS20180909-0532-0623_H06.seq
- 2018_9_CAD/137_CAD-F_TSS20180909-0532-0623_A07.ab1
- 2018_9_CAD/137_CAD-F_TSS20180909-0532-0623_A07.seq
- 2018_9_CAD/138_CAD-F_TSS20180909-0532-0623_B07.ab1
- 2018_9_CAD/138_CAD-F_TSS20180909-0532-0623_B07.seq
- 2018_9_CAD/139_CAD-F_TSS20180909-0532-0623_C07.ab1
- 2018_9_CAD/139_CAD-F_TSS20180909-0532-0623_C07.seq
- 2018_9_CAD/140_CAD-F_TSS20180909-0532-0623_D07.ab1
- 2018_9_CAD/140_CAD-F_TSS20180909-0532-0623_D07.seq
- 2018_9_CAD/141_CAD-F_TSS20180909-0532-0623_E07.ab1
- 2018_9_CAD/141_CAD-F_TSS20180909-0532-0623_E07.seq
- 2018_9_CAD/142_CAD-F_TSS20180909-0532-0623_F07.ab1
- 2018_9_CAD/142_CAD-F_TSS20180909-0532-0623_F07.seq
- 2018_9_CAD/143_CAD-F_TSS20180909-0532-0623_G07.ab1
- 2018_9_CAD/143_CAD-F_TSS20180909-0532-0623_G07.seq
- 2018_9_CAD/144_CAD-F_TSS20180909-0532-0623_H07.ab1
- 2018_9_CAD/144_CAD-F_TSS20180909-0532-0623_H07.seq
- 2018_9_CAD/145_CAD-F_TSS20180909-0532-0623_A08.ab1
- 2018_9_CAD/145_CAD-F_TSS20180909-0532-0623_A08.seq
- 2018_9_CAD/146_CAD-F_TSS20180909-0532-0623_B08.ab1
- 2018_9_CAD/146_CAD-F_TSS20180909-0532-0623_B08.seq
- 2018_9_CAD/147_CAD-F_TSS20180909-0532-0623_C08.ab1
- 2018_9_CAD/147_CAD-F_TSS20180909-0532-0623_C08.seq
- 2018_9_CAD/148_CAD-F_TSS20180909-0532-0623_D08.ab1
- 2018_9_CAD/148_CAD-F_TSS20180909-0532-0623_D08.seq
- 2018_9_CAD/149_CAD-F_TSS20180909-0532-0623_E08.ab1
- 2018_9_CAD/149_CAD-F_TSS20180909-0532-0623_E08.seq
- 2018_9_CAD/150_CAD-F_TSS20180909-0532-0623_F08.ab1
- 2018_9_CAD/150_CAD-F_TSS20180909-0532-0623_F08.seq
- 2018_9_CAD/151_CAD-F_TSS20180909-0532-0623_G08.ab1
- 2018_9_CAD/151_CAD-F_TSS20180909-0532-0623_G08.seq
- 2018_9_CAD/152_CAD-F_TSS20180909-0532-0623_H08.ab1
[truncated: 223 more entries]
