# Supplementary material for: Comparison Between Flat and Round Peaches, Genomic Evidences of Heterozygosity Events
Source: Front Plant Sci. 2019 May 14;10:592. doi: 10.3389/fpls.2019.00592 (PMC6535965; doi:10.3389/fpls.2019.00592)
Supplement: DATA SHEET S3 — The sanger sequencing of PCR product amplified from CAD_F/CAD_R primer pair in 258 peach accessions. [file Data_Sheet_3.ZIP › 2018_9_CAD/W2_WF_TSS20180914-0532-1036_B06.seq]

AGATGGGCAACTTTATGTCAGCCAGAACAGGTAAGGAGTTTTTCTAGTAATCAATCTCTCCTCACTAAGAACAGGCAAGGACTTTTTTTAGCAACTTAATTGTCATGATAAAAACATAAATGCTTATAATTTAATTCCTCAAATGTAAAACACAATAGTCATGTCCTTGAGATGTCTAAATAGCCCTTAAGAAACTGATGAAGGATACTTAACTAGATGACCCATTTGTTAATTTCGTGATCTCTCGTTCTGAGTTTGATTCGTGATTTAATGACATAGTGATAGTCCGTCCAAATTACAAATTGTCGTAGGTGATTTCATCTTAATCCTTTTCAACAAAATTTTGCTACACACAGGTAACTGTTGGACGGAAGCCAGTGACAGGCGTACAGTTATGTCTAGAAGGAAGCAAGCGAAATCCAACTTAAA
